# Supplementary material
Source: PubMed Central journal article supplement (PMC6276871)
Supplement: EMBJ-37-e100540-s001.pdf [file EMBJ-37-e100540-s001.pdf]

# **Appendix**

for

Shashi *et al.* “Loss of tubulin deglutamylase CCP1 causes infantile-onset neurodegeneration”

**Appendix Note S1 - Members of the Undiagnosed Diseases Network.**

**Appendix Figure S1 - Partial deletion of the *CCP1* gene (case J1).**

**Appendix Figure S2 - Sanger validation and segregation analysis of *CCP1* variants.**

**Appendix Figure S3 - CCP1 levels in transfected cells.**

**Appendix Figure S4 - Axon numbers in the saphenous nerve.**

**Appendix Table S1 - WES and data output.**

**Appendix Table S2 - Frequencies of disease-related CCP1 variants in control data sets.**

**Appendix Table S3 - Bioinformatic results for CCP1 amino acid substitutions.**

**Appendix Table S4 - Clinical findings in 13 individuals with biallelic *CCP1* variants.**

**Appendix References**

## **Appendix Note S1 - Members of the Undiagnosed Diseases Network.**

David R. Adams, Mercedes E. Alejandro, Patrick Allard, Euan A. Ashley, Mahshid S. Azamian, Carlos A. Bacino, Ashok Balasubramanyam, Hayk Barseghyan, Gabriel F. Batzli, Alan H. Beggs, Babak Behnam, Hugo J. Bellen, Jonathan A. Bernstein, Anna Bican, David P. Bick, Camille L. Birch, Devon Bonner, Braden E. Boone, Bret L. Bostwick, Lauren C. Briere, Donna M. Brown, Matthew Brush, Elizabeth A. Burke, Lindsay C. Burrage, Manish J. Butte, Shan Chen, Gary D. Clark, Terra R. Coakley, Joy D. Cogan, Cynthia M. Cooper, Heidi Cope, William J. Craigen, Precilla D'Souza, Mariska Davids, Jean M. Davidson, Jyoti G. Dayal, Esteban C. Dell'Angelica, Shweta U. Dhar, Katrina M. Dipple, Laurel A. Donnell-Fink, Naghmeh Dorrani, Daniel C. Dorset, Emilie D. Douine, David D. Draper, Annika M. Dries, David J. Eckstein. Lisa T. Emrick, Christine M. Eng, Gregory M. Enns, Ascia Eskin, Cecilia Esteves, Tyra Estwick, Liliana Fernandez, Carlos Ferreira, Paul G. Fisher, Brent L. Fogel, Noah D. Friedman, William A. Gahl, Emily Glanton, Rena A. Godfrey, David B. Goldstein, Sarah E. Gould, Jean-Philippe F. Gourdine, Catherine A. Groden, Andrea L. Gropman, Melissa Haendel, Rizwan Hamid, Neil A. Hanchard, Lori H. Handley, Matthew R. Herzog, Ingrid A. Holm, Jason Hom, Ellen M. Howerton, Yong Huang, Howard J. Jacob, Mahim Jain, Yong-hui Jiang, Jean M. Johnston, Angela L. Jones, David M. Koeller, Isaac S. Kohane, Jennefer N. Kohler, Donna M. Krasnewich, Elizabeth L. Krieg, Joel B. Krier, Jennifer E. Kyle, Seema R. Lalani, C. Christopher Lau, Jozef Lazar, Kimberly LeBlanc, Brendan H. Lee, Hane Lee, Shawn E. Levy, Richard A. Lewis, Sharyn A. Lincoln, Sandra K. Loo, Joseph Loscalzo, Richard L. Maas, Ellen F. Macnamara, Calum A. MacRae, Valerie V. Maduro, Marta M. Majcherska, May Christine V. Malicdan, Laura A. Mamounas, Teri A. Manolio, Thomas C. Markello, Ronit Marom, Martin G. Martin, Julian A. Martínez-Agosto, Shruti Marwaha, Thomas May, Allyn McConkie-Rosell, Colleen E. McCormack, Alexa T. McCray, Jason D. Merker, Thomas O. Metz, Matthew Might,

Paolo M. Moretti, Marie Morimoto, John J. Mulvihill, Jennifer L. Murphy, Donna M. Muzny, Michele E. Nehrebecky, Stan F. Nelson, J. Scott Newberry, John H. Newman, Sarah K. Nicholas. Donna Novacic, Jordan S. Orange, J. Carl Pallais, Christina GS. Palmer, Jeanette C. Papp, Neil H. Parker, Loren DM. Pena, John A. Phillips III, Jennifer E. Posey, John H. Postlethwait, Lorraine Potocki, Barbara N. Pusey, Chloe M. Reuter, Amy K. Robertson, Lance H. Rodan, Jill A. Rosenfeld, Jacinda B. Sampson, Susan L. Samson, Kelly Schoch, Molly C. Schroeder, Daryl A. Scott, Prashant Sharma, Vandana Shashi, Edwin K. Silverman, Janet S. Sinsheimer, Kevin S. Smith, Rebecca C. Spillmann, Joan M. Stoler, Nicholas Stong, Jennifer A. Sullivan, David A. Sweetser, Queenie K.-G. Tan, Cynthia J. Tiff, Camilo Toro, Alyssa A. Tran, Tiina K. Urv, Zaheer M. Valivullah, Eric Vilain, Tiphonie P. Vogel, Daryl M. Waggott, Colleen E. Wahl, Nicole M. Walley, Chris A. Walsh, Jijun Wan, Michael F. Wangler, Patricia A. Ward, Katrina M. Waters, Bobbie-Jo M. Webb-Robertson, Monte Westerfield, Matthew T. Wheeler, Anastasia L. Wise, Lynne A. Wolfe, Elizabeth A. Worthey, Shinya Yamamoto, Yaping Yang, Amanda J. Yoon, Guoyun Yu, Diane B. Zastrow, Chunli Zhao, Allison Zheng

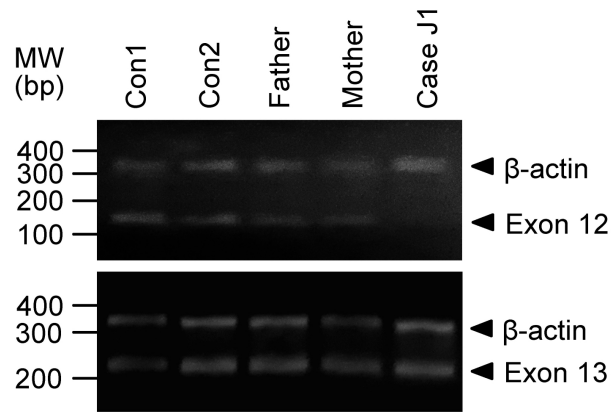

**Appendix Figure S1 - Partial deletion of the *CCPI* gene (case J1).**

Narrowing of the intragenic breakpoint by PCR amplification of fragments corresponding to exonic sequences predicted to be inside (exons 12) and outside (exon 13) the deletion region. In agreement with array CGH results, amplification of the exon 12-related fragment failed in patient's DNA while the exon 13-related product was detectable. Similar results were obtained for exons 10, 11 (inside the deletion region, no products) and 14 and 15 (outside the deletion region, products of the expected sizes) (data not shown). A  $\beta$ -actin primer set was used to ensure appropriate PCR set-up and sufficient template DNA quality and quantity. Con1-2: DNA samples from healthy, unrelated probands.

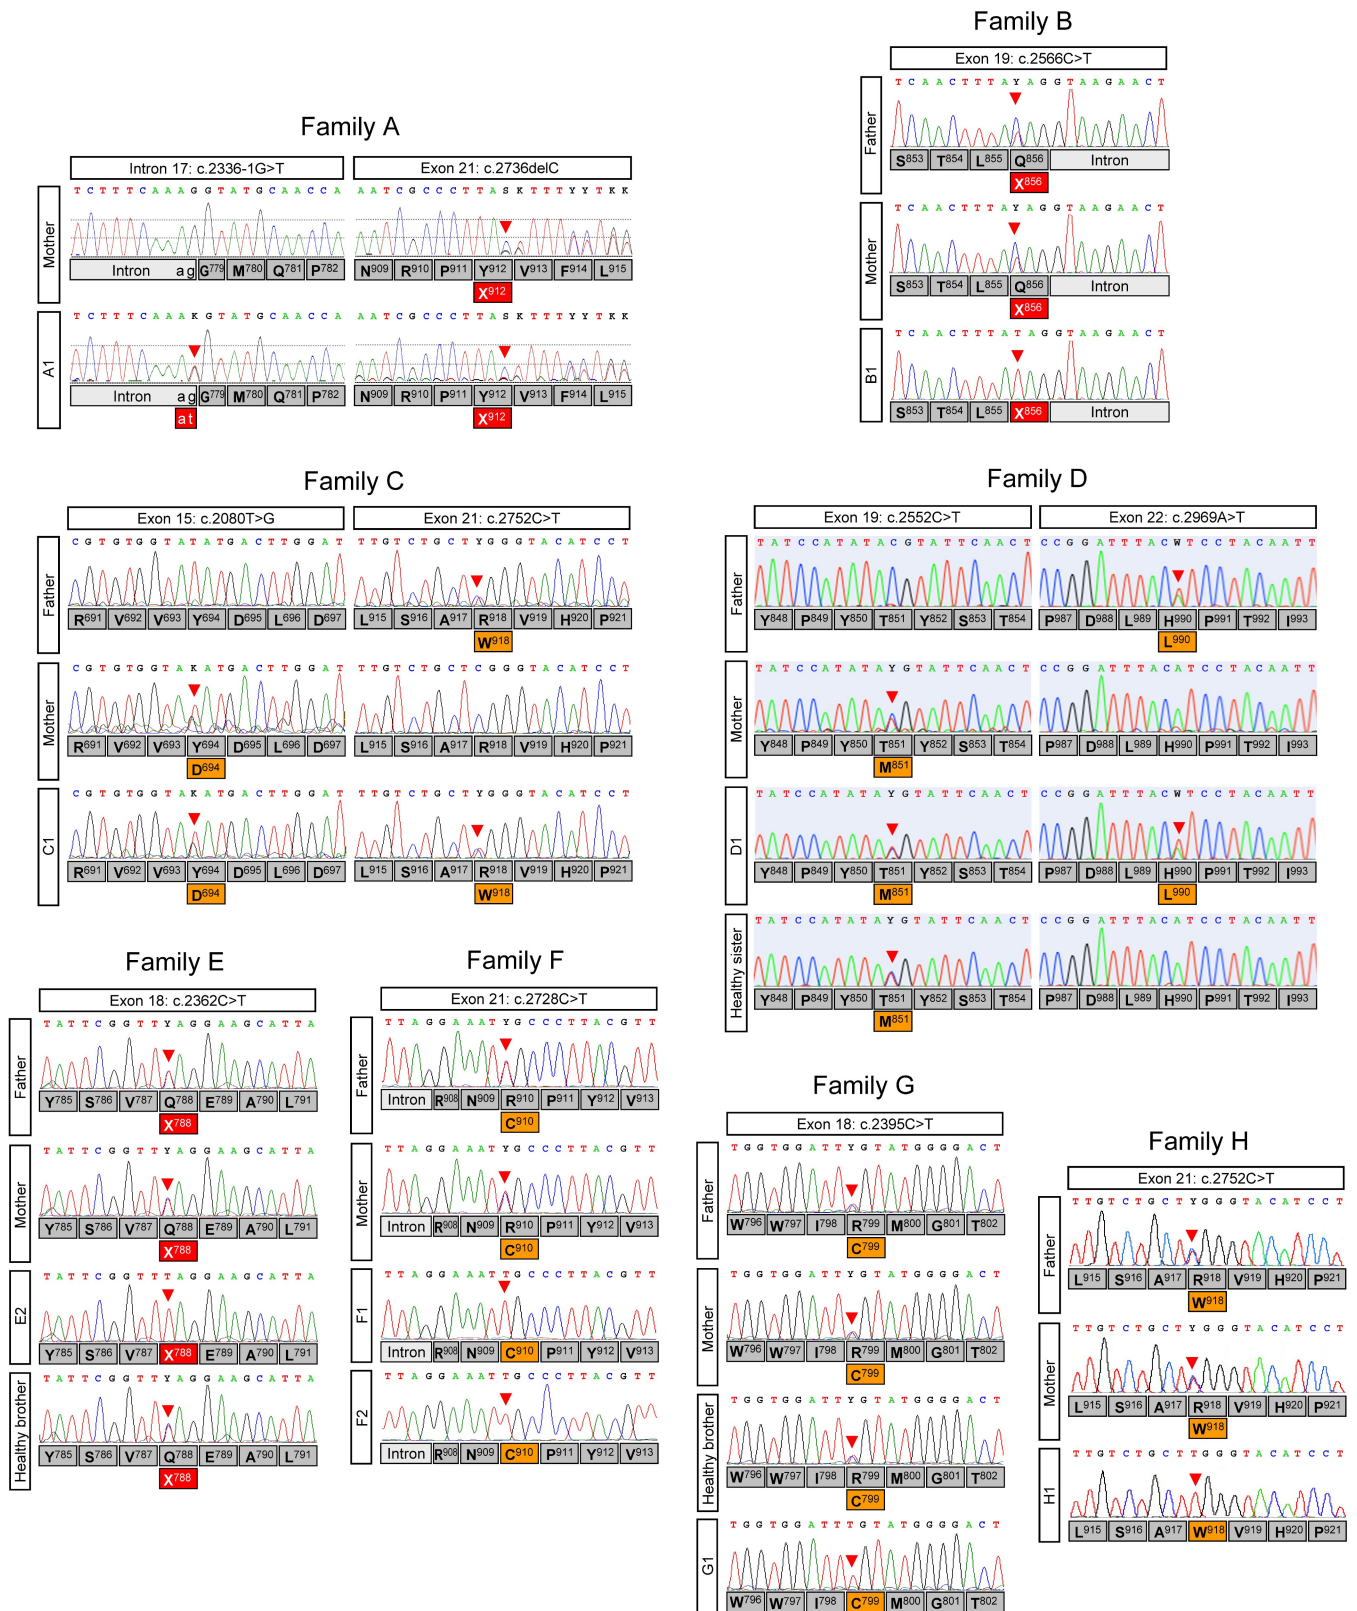

**Appendix Figure S2 - Sanger validation and segregation analysis of *CCPI* variants.** Variants segregate with the disease consistent with autosomal recessive inheritance in the families. All affected probands carried biallelic variants.

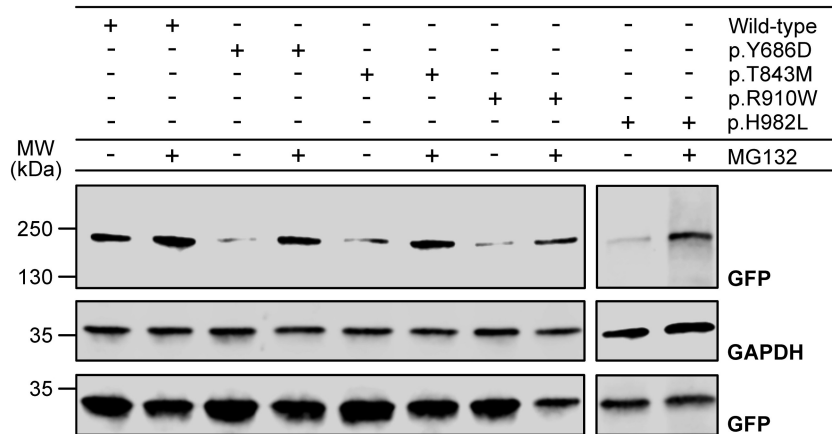

### Appendix Figure S3 - CCP1 levels in transfected cells.

HEK293 cells were co-transfected with expression vectors encoding mouse wild-type and mutant CCP1-YFP and GFP (to control for transfection efficiency). After 7 hours, cells were treated with 5  $\mu$ M MG132 proteasome inhibitor or vehicle (DMSO) for additional 17 hours. Protein extracts were subjected to western blotting and proteins were detected using primary antibodies as indicated. CCP1 mutants showed lower baseline protein levels which were normalized upon treatment with MG132. Residues Y686, T843, R910 and H982 of mouse CCP1 align to residues Y694, T851, R918 and H990 of the human ortholog.

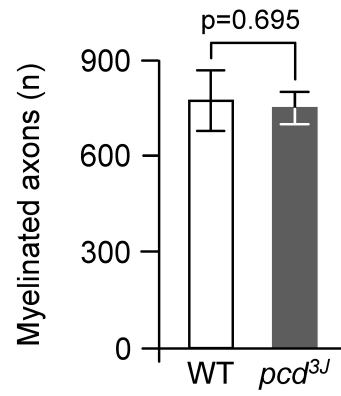

**Appendix Figure S4 - Axon numbers in the saphenous nerve.**

Quantification of myelinated axons in the pure sensory femoral saphenous nerves of WT and *pcd* mice. Graphs: Mean  $\pm$  SD, n = 3. P-value: Student's unpaired two-tailed t-test.

**Appendix Table S1 - WES and data output.**

|                                                   | <b>Family A</b>                                                                                                                                    | <b>Family B</b>                                                                                                                        | <b>Family C</b>                                                                                                        | <b>Family D</b>                                                                                               | <b>Family E</b>                                                                       | <b>Family F</b>                                                                       | <b>Family G</b>                                                                       | <b>Family H</b>                                                                        | <b>Family I</b>                              |
|---------------------------------------------------|----------------------------------------------------------------------------------------------------------------------------------------------------|----------------------------------------------------------------------------------------------------------------------------------------|------------------------------------------------------------------------------------------------------------------------|---------------------------------------------------------------------------------------------------------------|---------------------------------------------------------------------------------------|---------------------------------------------------------------------------------------|---------------------------------------------------------------------------------------|----------------------------------------------------------------------------------------|----------------------------------------------|
| <b>Enrichment</b>                                 | Agilent Clinical Research Exome                                                                                                                    | Agilent SureSelect50Mbv5                                                                                                               | Agilent SureSelectXTv4                                                                                                 | Illumina TruSeq Exome Enrichment                                                                              | Illumina Rapid Capture Enrichment                                                     | Agilent SureSelect50Mbv5                                                              | Nextera Rapid Capture Exome v1.2                                                      | Illumina TruSeq Exome Enrichment                                                       | Roche VCRome_v2.1                            |
| <b>Sequencing type</b>                            | Mother & affected proband WES                                                                                                                      | Father & mother of affected proband WES <sup>3)</sup>                                                                                  | Affected proband WES                                                                                                   | Father, mother, affected proband & healthy sibling WES                                                        | Affected proband WES                                                                  | Affected proband & affected sibling WES                                               | Affected proband WES                                                                  | Affected proband WES                                                                   | Father, mother & affected proband WES        |
| <b>Platform</b>                                   | Illumina HiSeq2000                                                                                                                                 | Illumina HiSeq2000                                                                                                                     | Illumina HiSeq2000                                                                                                     | Illumina HiSeq2000                                                                                            | Illumina HiSeq4000                                                                    | Illumina HiSeq2000                                                                    | Illumina HiSeq4000                                                                    | Illumina HiSeq4000                                                                     | Illumina HiSeq2000                           |
| <b>Read alignment</b>                             | BWA-Mem (v0.7.8)                                                                                                                                   | BWA (v0.5.8)                                                                                                                           | BWA (v0.5.8)                                                                                                           | NovoAlign                                                                                                     | BWA (v0.5.8)                                                                          | BWA (v0.5.8)                                                                          | BWA (v0.5.8)                                                                          | BWA (v0.5.8)                                                                           | Edico DRAGEN BioIT platform                  |
| <b>Variant calling</b>                            | SAMtools (v0.1.18) & GATK Haplotype Caller (v3.1.7)                                                                                                | SAMtools (v0.1.7)                                                                                                                      | GATK (v3.3)                                                                                                            | MPG                                                                                                           | GATK (v3.6)                                                                           | GATK (v3.3)                                                                           | GATK (v3.6)                                                                           | GATK (v3.3)                                                                            | Edico Drogen haplotype-based variant calling |
| <b>Criteria for variant exclusion</b>             | Variants with MAF >.01 in 1000G, >.05 in ExAC, >.005 in >80,000 internal exomes, genes with homozygous variants in >3 controls, or SNV quality <20 | HapMap SNPs with average heterozygosity $\geq$ .02 (dbSNP135), variants with MAF >.0007 in >11,000 internal exomes, or SNV quality <30 | Variants with MAF >.05 in dbSNP137, >.01 in >2,000 internal exomes, or missense variants with a PhyloP60way score <3.5 | Variants with MAF $\geq$ .005 in ExAC, ESP & 587 internal exomes, CADD score $\leq$ 20, or coverage $\leq$ 10 | Variants with MAF $\geq$ .001 in ExAC & >5,000 internal exomes, or coverage $\leq$ 10 | Variants with MAF $\geq$ .001 in ExAC & >5,000 internal exomes, or coverage $\leq$ 10 | Variants with MAF $\geq$ .001 in ExAC & >5,000 internal exomes, or coverage $\leq$ 10 | Variants with MAF $\geq$ .01 in ExAC, ESP 3,000 internal exomes, or coverage $\leq$ 10 | Variants with MAF >.01 in ExAC               |
| <b>Read depth<sup>1)</sup></b>                    |                                                                                                                                                    |                                                                                                                                        |                                                                                                                        |                                                                                                               |                                                                                       |                                                                                       |                                                                                       |                                                                                        |                                              |
| Mean                                              | 158x                                                                                                                                               | 130x/117x                                                                                                                              | 76x                                                                                                                    | 58x                                                                                                           | 124x                                                                                  | 84x                                                                                   | 110x                                                                                  | 100x                                                                                   | 150x                                         |
| $\geq$ 10x                                        | 97%                                                                                                                                                | 99%/99%                                                                                                                                | 98%                                                                                                                    | 95%                                                                                                           | 98%                                                                                   | 95%                                                                                   | 97%                                                                                   | 96%                                                                                    | 99%                                          |
| $\geq$ 20x                                        | 95%                                                                                                                                                | 98%/98%                                                                                                                                | 93%                                                                                                                    | 79%                                                                                                           | 96%                                                                                   | 88%                                                                                   | 95%                                                                                   | 99%                                                                                    | 99%                                          |
| <b>Number of identified variants<sup>2)</sup></b> |                                                                                                                                                    |                                                                                                                                        |                                                                                                                        |                                                                                                               |                                                                                       |                                                                                       |                                                                                       |                                                                                        |                                              |
| Putative biallelic                                | 1                                                                                                                                                  | 40 <sup>3)</sup>                                                                                                                       | 2                                                                                                                      | 2                                                                                                             | 7                                                                                     | 2                                                                                     | 6                                                                                     | 4                                                                                      | 10                                           |
| Putative <i>de novo</i>                           | Not available                                                                                                                                      | Not available                                                                                                                          | Not available                                                                                                          | 1                                                                                                             | Not available                                                                         | Not available                                                                         | Not available                                                                         | Not available                                                                          | 2                                            |
| Putative X-linked                                 | Not considered                                                                                                                                     | Not considered                                                                                                                         | Not considered                                                                                                         | 1                                                                                                             | Not considered                                                                        | Not considered                                                                        | Not considered                                                                        | Not considered                                                                         | 1                                            |

<sup>1)</sup>Figures refer to proband's sample except for family B where values are given in the format paternal sample/maternal sample.

<sup>2)</sup>Frameshift, nonsense, splice site, missense, in-frame indel.



<sup>3)</sup>Quality of the DNA sample from the deceased proband B1 was not suitable for WES. Analysis of DNA samples from the parents yielded 40 genes in which they both carried identical heterozygous variants. Eight variants were considered unlikely based on frequency in databases, low scores for conservation and bioinformatic predictions of pathogenicity, different or no phenotype in knockout mouse models, or known association to another, non-overlapping human disease. For the remaining 32 variants, we performed Sanger sequencing using the proband's DNA sample and found homozygosity for 10 variants while the remaining 22 variants were either heterozygous or absent. We did not consider genes in which the parents carried different heterozygous variants because we expected a homozygous disease-causing variant in the child due to known parental consanguinity.

**Appendix Table S2 - Frequencies of disease-related CCP1 variants in control data sets.**

|                                | gnomAD <sup>1)</sup> | ESP <sup>2)</sup> | 1000G <sup>3)</sup> | HZM <sup>4)</sup> |
|--------------------------------|----------------------|-------------------|---------------------|-------------------|
| <b>Number of samples</b>       | 138,632              | 6,503             | 2,504               | 11,325            |
| <b>c.988C&gt;T;p.R330*</b>     | 1 (3.23e-5)          | 0                 | 0                   | 0                 |
| <b>c.2080T&gt;G;p.Y694D</b>    | 0                    | 0                 | 0                   | 0                 |
| <b>c.2336-1G&gt;T;p.M780fs</b> | 0                    | 0                 | 0                   | 0                 |
| <b>c.2362C&gt;T;p.Q788*</b>    | 0                    | 0                 | 0                   | 0                 |
| <b>c.2395C&gt;T;p.R799C</b>    | 0                    | 0                 | 0                   | 0                 |
| <b>c.2552C&gt;T;p.T851M</b>    | 0                    | 0                 | 0                   | 1 (4.42e-5)       |
| <b>c.2566C&gt;T;p.Q856*</b>    | 0                    | 0                 | 0                   | 0                 |
| <b>c.2728C&gt;T;p.R910C</b>    | 0                    | 0                 | 0                   | 0                 |
| <b>c.2736delC;p.Y912*</b>      | 1 (4.12e-6)          | 0                 | 0                   | 0                 |
| <b>c.2752C&gt;T;p.R918W</b>    | 0                    | 0                 | 0                   | 0                 |
| <b>c.2969A&gt;T;p.H990L</b>    | 0                    | 0                 | 0                   | 0                 |

<sup>1)</sup>GnomAD: 123,136 exomes and 15,496 genomes from unrelated individuals sequenced as part of various disease-specific and population genetic studies contained in the Genome Aggregation Database (gnomAD) (Lek *et al.*, 2016)

<sup>2)</sup>ESP: Exomes from 6,503 individuals with heart, lung and blood disorders included in the NHLBI GO Exome Sequencing Project (ESP) (Fu *et al.*, 2013)

<sup>3)</sup>1000G: Genomes from 2,504 individuals who declared themselves to be healthy at the time the samples were collected (Sudmant *et al.*, 2015)

<sup>4)</sup>HZM: Exomes from 11,325 individuals with various genetic and acquired diseases contained in the WES repository of the Helmholtz Zentrum München (HZM)

**Appendix Table S3 - Bioinformatic results for CCP1 amino acid substitutions.**

|                                                              | <b>c.2080T&gt;G;<br/>p.Y694D</b> | <b>c.2395C&gt;T;<br/>p.R799C</b> | <b>c.2552C&gt;T;<br/>p.T851M</b> | <b>c.2728C&gt;T;<br/>p.R910C</b> | <b>c.2752C&gt;T;<br/>p.R918W</b> | <b>c.2969A&gt;T;<br/>p.H990L</b> |
|--------------------------------------------------------------|----------------------------------|----------------------------------|----------------------------------|----------------------------------|----------------------------------|----------------------------------|
| <b>PROVEAN prediction (score)<sup>1)</sup></b>               | Deleterious (-7.84)              | Deleterious (-7.53)              | Deleterious (-5.43)              | Deleterious (-6.63)              | Deleterious (-7.14)              | Deleterious (-7.16)              |
| <b>SIFT prediction (score)<sup>2)</sup></b>                  | Damaging (0)                     |
| <b>PolyPhen-2 prediction (score)<sup>3)</sup></b>            | Probably damaging (.99)          | Probably damaging (.99)          | Probably damaging (1)            | Probably damaging (.99)          | Probably damaging (.99)          | Probably damaging (.95)          |
| <b>CADD prediction (phred-like score)<sup>4)</sup></b>       | Damaging (29)                    | Damaging (35)                    | Damaging (33)                    | Damaging (35)                    | Damaging (35)                    | Damaging (33)                    |
| <b>LRT prediction (LRT<sub>new</sub> score)<sup>5)</sup></b> | Deleterious (1.00)               |
| <b>SNAP2 prediction (score)<sup>6)</sup></b>                 | Effect (85)                      | Effect (52)                      | Effect (65)                      | Effect (64)                      | Effect (95)                      | Effect (31)                      |
| <b>MutationAssessor prediction (score)<sup>7)</sup></b>      | Medium (2.79)                    | High (3.91)                      | High (4.30)                      | High (3.7)                       | High (3.84)                      | Medium (3.25)                    |
| <b>VEST3 score<sup>8)</sup></b>                              | .95                              | .98                              | .95                              | .95                              | .97                              | .98                              |
| <b>MutationTaster2 prediction (score)<sup>9)</sup></b>       | Disease causing (.99)            |
| <b>PMut prediction (score)<sup>10)</sup></b>                 | Disease (.79)                    | Disease (.89)                    | Disease (.89)                    | Disease (.87)                    | Disease (.91)                    | Disease (.87)                    |
| <b>GERP++ score<sup>11)</sup></b>                            | 5.54                             | 5.50                             | 4.95                             | 5.65                             | 5.65                             | 5.69                             |
| <b>PhastCons100way score<sup>12)</sup></b>                   | 1.00                             | 1.00                             | 1.00                             | 1.00                             | 1.00                             | 1.00                             |
| <b>PhyloP100way score<sup>12)</sup></b>                      | 8.80                             | 4.90                             | 9.87                             | 7.77                             | 5.12                             | 8.04                             |

<sup>1)</sup>PROVEAN (Choi *et al.*, 2012) scores equal or below -2.50 are considered “deleterious”.

<sup>2)</sup>SIFT (Kumar *et al.*, 2009) scores  $\leq .05$  are assigned the prediction “damaging”.

<sup>3)</sup>PolyPhen-2 (Adzhubei *et al.*, 2010) scores near 1 are most strongly predicting a “damaging” effect of an amino substitution.

<sup>4)</sup>CADD (Kircher *et al.*, 2014) phred-like rank scores above 15 (for a more conservative estimate: above 20) are considered “damaging”.

<sup>5)</sup>Values for the LRT<sub>new</sub> (Chun & Fay, 2009) score range from 0 to 1 with higher values indicating a variant is more likely to be “deleterious”.

<sup>6)</sup>SNAP2 (Hecht *et al.*, 2015) scores range from -100 strong neutral prediction to +100 strong effect prediction.

<sup>7)</sup>MutationAssessor (Reva *et al.*, 2011) scores range from -5.14 to 6.49 with higher scores indicating increasing likelihood of functional impact of a variant. Score cutoff between “neutral”, “low”, “medium” and “high” predictions are 0.8, 1.94 and 3.50.

<sup>8)</sup>VEST3 (Carter *et al.*, 2013) score ranges from 0 to 1. The larger the score the more likely the variant may cause functional change.

<sup>9)</sup>The probability value given by MutationTaster2 (Schwarz *et al.*, 2010) is the probability of the prediction, i.e. a value close to 1 indicates a high “security” of the prediction.

<sup>10)</sup>The PMut (López-Ferrando *et al.*, 2017) classifier outputs a prediction score between 0 and 1; mutations scoring from 0 to 0.5 are classified as “neutral”, and those scoring from 0.5 to 1 are classified as “disease”.

<sup>11)</sup>GERP++ (Davydov *et al.*, 2010) estimates evolutionary constraint of specific positions in 36 mammalian species. Scores range from -12.36 to 6.18 with higher scores indicating more conserved sites.

<sup>12)</sup>PhastCons and PhyloP (Pollard *et al.*, 2010) conservation scores are based on multiple alignments of 100 vertebrate genomes. Scores range from 0 to 1 for PhastCons and from -20 to 9.87 for PhyloP with higher scores suggesting stronger conservation of the site.

**Appendix Table S4 - Clinical findings in 13 individuals with biallelic *CCPI* variants.**

|                                              | Family A                  | Family B                     | Family C             | Family D                    | Family E              |                       |                                     | Family F         |                    | Family G                    | Family H                                         | Family I                          | Family J                           |
|----------------------------------------------|---------------------------|------------------------------|----------------------|-----------------------------|-----------------------|-----------------------|-------------------------------------|------------------|--------------------|-----------------------------|--------------------------------------------------|-----------------------------------|------------------------------------|
| <b>Consanguinity / ethnicity</b>             | No / Caucasian            | Yes / Persian                | No / Caucasian       | No / Caucasian              | Yes / Egyptian        |                       |                                     | Yes / Egyptian   |                    | Yes / Egyptian              | Yes / Saudi Arab                                 | No / African American, Caucasian  | Yes / Caucasian                    |
| <b>Identified variants</b>                   | c.2336-1G>T, p.Y912*      | p.Q856* (hom.)               | p.Y694D, p.R918W     | p.T851M, p.H990L            | p.Q788* (hom.)        |                       |                                     | p.R910C (hom.)   |                    | p.R799C (hom.)              | p.R918W (hom.)                                   | p.R330*, p.Y912*                  | Del exons 1-12 (hom.)              |
| <b>Individual</b>                            | A1                        | B1                           | C1                   | D1                          | E1                    | E2                    | E3                                  | F1               | F2                 | G1                          | H1                                               | I1                                | J1                                 |
| <b>Sex / age</b>                             | F / 2 y                   | F / † 16 m                   | F / 5 y              | M / 14 y                    | M / † 8 m             | F / † 5 m             | M / † 4 m                           | M / 8 y          | F / 5 y            | M / 8 y                     | M / † 12 m                                       | F / 20 m                          | F / † 7 m                          |
| <b>Pregnancy</b>                             | Normal                    | Normal                       | Normal               | Normal                      | Normal                | Normal                | Fetal MRI: Abnormal corpus callosum | Normal           | Normal             | Bleeding in early pregnancy | Normal                                           | Normal                            | Normal                             |
| <b>Birth</b>                                 | Normal                    | C-section                    | Normal               | C-section                   | Normal                | C-section             | C-section                           | Normal           | C-section          | Normal                      | C-section                                        | C-section                         | Normal                             |
| <b>Age of onset / first symptom</b>          | 2 m / hypotonia           | 4 m / abnormal eye movements | 3 m / hypotonia      | Birth / hypotonia           | 2 m / GDD, FTT        | 2 m / GDD, FTT        | 2 m / GDD, FTT                      | 20 m / hypotonia | 4 m / hypotonia    | 3 m / hypotonia             | 3 m / hypotonia, tongue fasciculations, weak cry | 6 m / eye movements abnormal, GDD | 3 m / upper limb tremor, weak suck |
| <b>Progressive disease course</b>            | Worsening of head control | Loss of head control         | Loss of rolling over | Worsening of balance        | Yes                   | Yes                   | Yes                                 | Loss of crawling | Yes                | Worsening of dystonia       | Yes                                              | Yes                               | Yes                                |
| <b>Microcephaly</b>                          | Yes                       | No                           | Yes                  | No                          | Yes                   | Yes                   | Yes (-2.5 SD)                       | No               | No                 | Yes (-2.8 SD)               | Yes                                              | No                                | Yes (-2.2 SD)                      |
| <b>Motor delay</b>                           | Profound                  | Profound                     | Profound             | Mild                        | Profound              | Profound              | Profound                            | Severe           | Severe             | Severe                      | Profound                                         | Severe                            | Profound                           |
| <b>Best motor ability / age when reached</b> | Knee flexion / 6 m        | Neck flexion / 4 m           | Rolling over / n.a.  | Walking / 14 m              | No motor development  | No motor development  | No motor development                | Crawling / 12 m  | Neck flexion / 4 m | Standing with support       | No motor development                             | Rolling over / 8 m                | No motor development               |
| <b>Cognitive delay, mental retardation</b>   | No speech                 | No speech                    | No speech            | Autism, learning disability | No visual recognition | No visual recognition | No visual recognition               | Severe           | Severe             | No speech                   | No visual recognition                            | No speech                         | Profound                           |
| <b>Eye movement abnormalities</b>            | Strabismus, slow saccades | Strabismus                   | Strabismus           | Upgaze palsy, slow saccades | Strabismus            | No                    | Strabismus                          | No               | Upgaze palsy       | Strabismus, nystagmus       | Strabismus                                       | Strabismus, nystagmus             | Nystagmus                          |
| <b>Hypotonia</b>                             | Yes                       | Yes                          | Yes                  | Yes                         | Yes                   | Yes                   | Yes                                 | Yes              | Yes                | Yes                         | Yes                                              | Yes                               | Yes                                |
| <b>Muscle weakness</b>                       | Tetraplegia               | Tetraparesis                 | Tetraparesis         | Lower limb                  | Yes                   | Yes                   | Yes                                 | Yes              | Yes                | Yes                         | Tetraplegia                                      | No                                | Tetraparesis                       |
| <b>Muscle wasting</b>                        | Yes                       | Yes                          | No                   | No                          | No                    | No                    | No                                  | Yes              | Yes                | Yes                         | No                                               | No                                | Yes                                |
| <b>Fasciculations</b>                        | Tongue                    | Tongue                       | No                   | No                          | No                    | No                    | No                                  | No               | No                 | No                          | Tongue                                           | No                                | Tongue                             |
| <b>Tendon reflexes</b>                       | 0                         | 0                            | 3+                   | 3+                          | 0                     | 0                     | 0                                   | 3+               | 3+                 | 3+                          | 0                                                | 2+                                | 0                                  |

(continued on next page)

**Appendix Table S4 - Clinical findings in 13 individuals with biallelic *CCPI* variants.** (continued from previous page).

|                                  | Family A                                       | Family B                                       | Family C                       | Family D                            | Family E                                       |                                                |                                                | Family F           |                    | Family G           | Family H                                 | Family I           | Family J                                                    |
|----------------------------------|------------------------------------------------|------------------------------------------------|--------------------------------|-------------------------------------|------------------------------------------------|------------------------------------------------|------------------------------------------------|--------------------|--------------------|--------------------|------------------------------------------|--------------------|-------------------------------------------------------------|
| Individual                       | A1                                             | B1                                             | C1                             | D1                                  | E1                                             | E2                                             | E3                                             | F1                 | F2                 | G1                 | H1                                       | I1                 | J1                                                          |
| <b>Ataxia</b>                    | n.e.                                           | n.e.                                           | n.e.                           | Yes                                 | n.e.                                           | n.e.                                           | n.e.                                           | Yes                | Yes                | Yes                | n.e.                                     | Yes                | n.e.                                                        |
| <b>Dystonia</b>                  | No                                             | No                                             | Yes                            | No                                  | No                                             | No                                             | No                                             | Yes                | Yes                | Yes                | No                                       | No                 | No                                                          |
| <b>Spasticity</b>                | No                                             | No                                             | Lower limb                     | Lower limb                          | No                                             | No                                             | No                                             | Yes                | Yes                | Yes                | No                                       | Yes                | No                                                          |
| <b>Respiratory insufficiency</b> | Tracheostomy, nightly BIPAP                    | Yes                                            | No                             | No                                  | No                                             | No                                             | No                                             | No                 | No                 | No                 | Yes                                      | No                 | Yes                                                         |
| <b>Feeding difficulties</b>      | Gastrostomy                                    | Yes                                            | Gastrostomy                    | No                                  | FTT                                            | FTT                                            | FTT                                            | No                 | No                 | No                 | No                                       | Yes                | Yes                                                         |
| <b>Retina degeneration</b>       | No                                             | No                                             | n.d.                           | No                                  | No                                             | No                                             | No                                             | No                 | No                 | No                 | n.d.                                     | No                 | n.d.                                                        |
| <b>Brain MRI</b>                 | Cerebellar atrophy, dysplastic corpus callosum | Cerebellar atrophy, dysplastic corpus callosum | Cerebellar atrophy             | Cerebellar atrophy                  | Cerebellar atrophy, dysplastic corpus callosum | Cerebellar atrophy, dysplastic corpus callosum | Cerebellar atrophy, dysplastic corpus callosum | Cerebellar atrophy | Cerebellar atrophy | Cerebellar atrophy | Cerebellar atrophy, global brain atrophy | Cerebellar atrophy | Cerebellar atrophy, hypoplastic corpus callosum, small pons |
| <b>Nerve conduction studies</b>  | Axonal motor neuropathy                        | Axonal motor neuropathy                        | Normal                         | Axonal motor predominant neuropathy | n.d.                                           | n.d.                                           | n.d.                                           | n.d.               | n.d.               | n.d.               | Motor neuropathy                         | n.d.               | Axonal motor neuropathy                                     |
| <b>Electromyography</b>          | Denervation                                    | Denervation, marked neurogenic reorganization  | Normal                         | Mild neurogenic pattern             | n.d.                                           | n.d.                                           | n.d.                                           | n.d.               | n.d.               | n.d.               | n.a.                                     | n.d.               | Denervation                                                 |
| <b>Muscle ultrasound</b>         | Hyperechoic, atrophy                           | n.d.                                           | n.d.                           | Hyperechoic, atrophy                | n.d.                                           | n.d.                                           | n.d.                                           | n.d.               | n.d.               | n.d.               | n.d.                                     | n.d.               | n.d.                                                        |
| <b>Muscle biopsy</b>             | n.d.                                           | Denervation atrophy, type 1 fibre predominance | Mild type 1 fibre predominance | n.d.                                | n.d.                                           | n.d.                                           | n.d.                                           | n.d.               | n.d.               | n.d.               | Denervation atrophy                      | n.d.               | n.d.                                                        |

† = Deceased; BIPAP = Biphasic positive airway pressure ventilation; F = Female; FTT = Failure to thrive; GDD = Global developmental delay; hom. = Homozygous; M = Male; m = Months; MRI = Magnetic resonance imaging; n.a. = Not available; n.d. = Not done; n.e.= Not examinable (due to severe weakness); SD = Standard deviation; y = Years; Deep tendon reflexes: 0 = Absent, 1+ = Diminished, 2+ = Normal, 3+ = Brisk, 4+ = Hyperactive and clonus

## Appendix References

Fu W, O'Connor TD, Jun G, Kang HM, Abecasis G, Leal SM, Gabriel S, Rieder MJ, Altshuler D, Shendure J, Nickerson DA, Bamshad MJ, Akey JM (2013) Analysis of 6,515 exomes reveals the recent origin of most human protein-coding variants. *Nature* 493: 216-20

Sudmant PH, Rausch T, Gardner EJ, Handsaker RE, Abyzov A, Huddleston J, Zhang Y, Ye K, Jun G, Hsi-Yang Fritz M, Konkel MK, Malhotra A, Stutz AM, Shi X, Paolo Casale F, Chen J, Hormozdiari F, Dayama G, Chen K, Malig M et al. (2015) An integrated map of structural variation in 2,504 human genomes. *Nature* 526: 75-81
